# Supplementary material
Source: PubMed Central journal article supplement (PMC11042682)
Supplement: NIHMS1876846-supplement-2.pdf [file NIHMS1876846-supplement-2.pdf]

# 1 Supplementary Figures and Legends

Figure. S1.

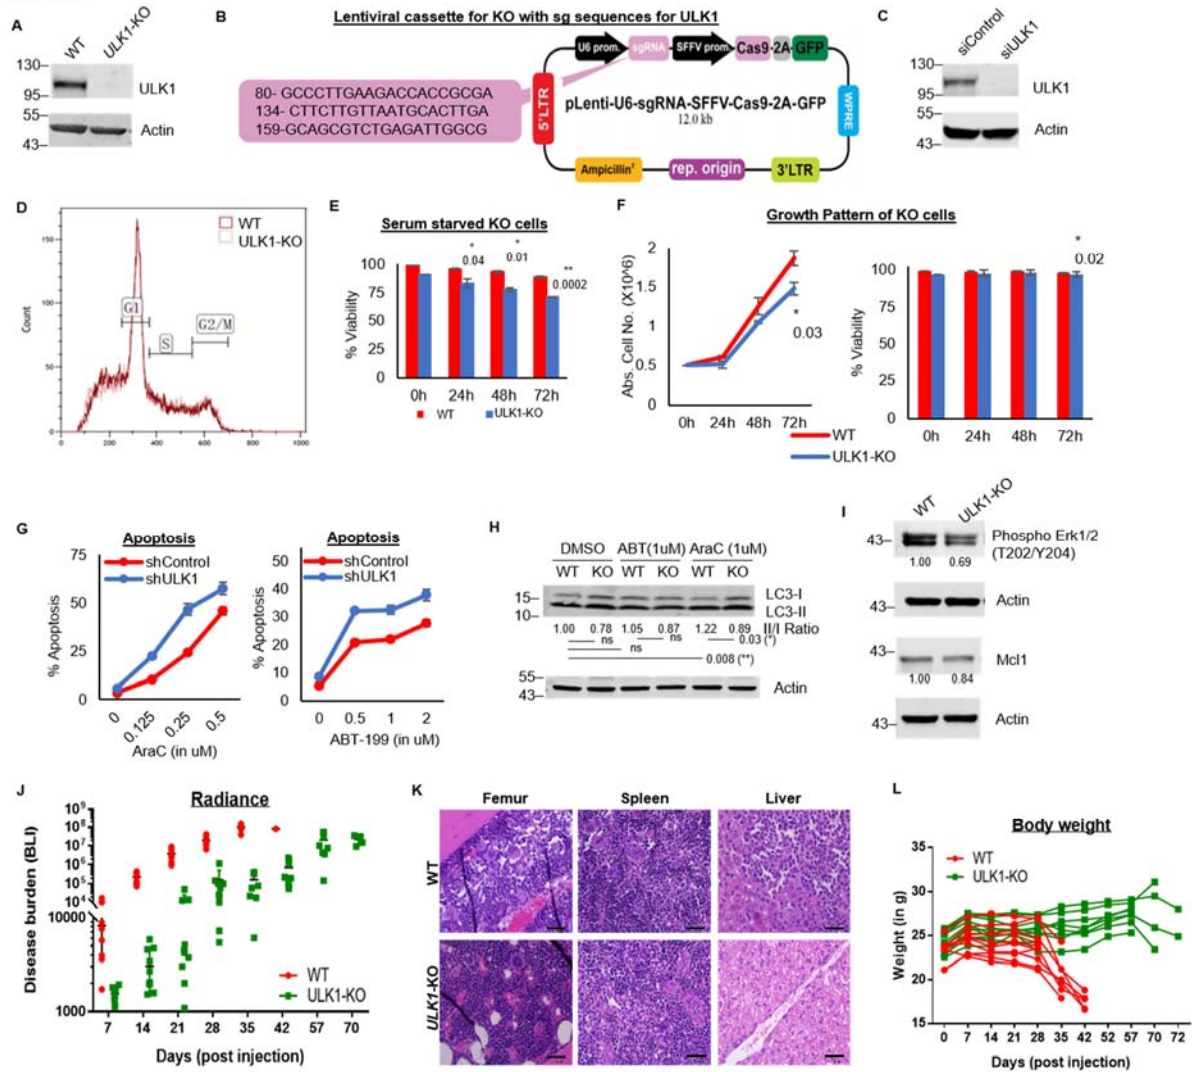

2  
3 **Supplementary Figure S1. Effect of genetic abrogation of *ULK1* in vitro and in vivo.** (A)  
4 Western blot analysis showing *ULK1* expression in whole cell lysates of control (WT) and *ULK1*-  
5 KO cells generated in OCI-AML3. (B) Pictorial representation of the guide sequences and  
6 lentiviral cassette used for *ULK1*-KO. (C) Western blot analysis showing *ULK1* expression in  
7 whole cell lysates of shControl and shULK1 cells generated in OCI-AML3. (D) Representative  
8 histograms from EdU incorporation assay showing a comparative analysis of cell cycle profile of  
9 control (WT) and *ULK1*-KO cells. (E) Representative bar graphs showing percent viability (from  
10 triplicates  $\pm$  SD) measured by Trypan Blue staining using a Vi-Cell counter in control (WT) and  
11 *ULK1*-KO cells cultured simultaneously under serum starved conditions. Cells were collected  
12 every 24 hours. (F) Representative line graphs showing absolute cell numbers (from triplicates  $\pm$   
13 SD; left) and representative bar graphs showing percent viability (from triplicates  $\pm$  SD; right)  
14 measured by Trypan Blue staining using a Vi-Cell counter in control (WT) and *ULK1*-KO cells  
15 cultured simultaneously without replenishing media upto 72 hours. Cells were collected every 24

16 hours. (G) Representative line graphs showing percent apoptosis (from triplicates  $\pm$  SD) from  
 17 Annexin V/DAPI assay in shControl and shULK1 cells simultaneously treated with increasing  
 18 doses as indicated of either AraC (left) or ABT-199 (right) for 72 hours. (H) Western blot analysis  
 19 of whole cell lysates of control (WT) and *ULK1*-KO (KO) cells, treated with DMSO, AraC or  
 20 ABT-199. (I) Western blot analysis of whole cell lysates of WT and *ULK1*-KO cells for phospho-  
 21 Erk1/2 (T202/Y204) and Mcl1. Actin was used as the loading control and for densitometric  
 22 measurements for all western blots. (J) Representative dot plot showing quantification of radiance  
 23 from each individual mouse using the Living Image software (Caliper Life Sciences) based on BLI  
 24 over time. (K) Representative images of H&E staining (40X magnification, 50  $\mu$ m scale bar) to  
 25 analyze infiltration of leukemia in different organs as indicated in the control and *ULK1*-KO group.  
 26 (L) Representative line graph showing body weights of individual mice during the course of the  
 27 experiment.  
 28  
 29

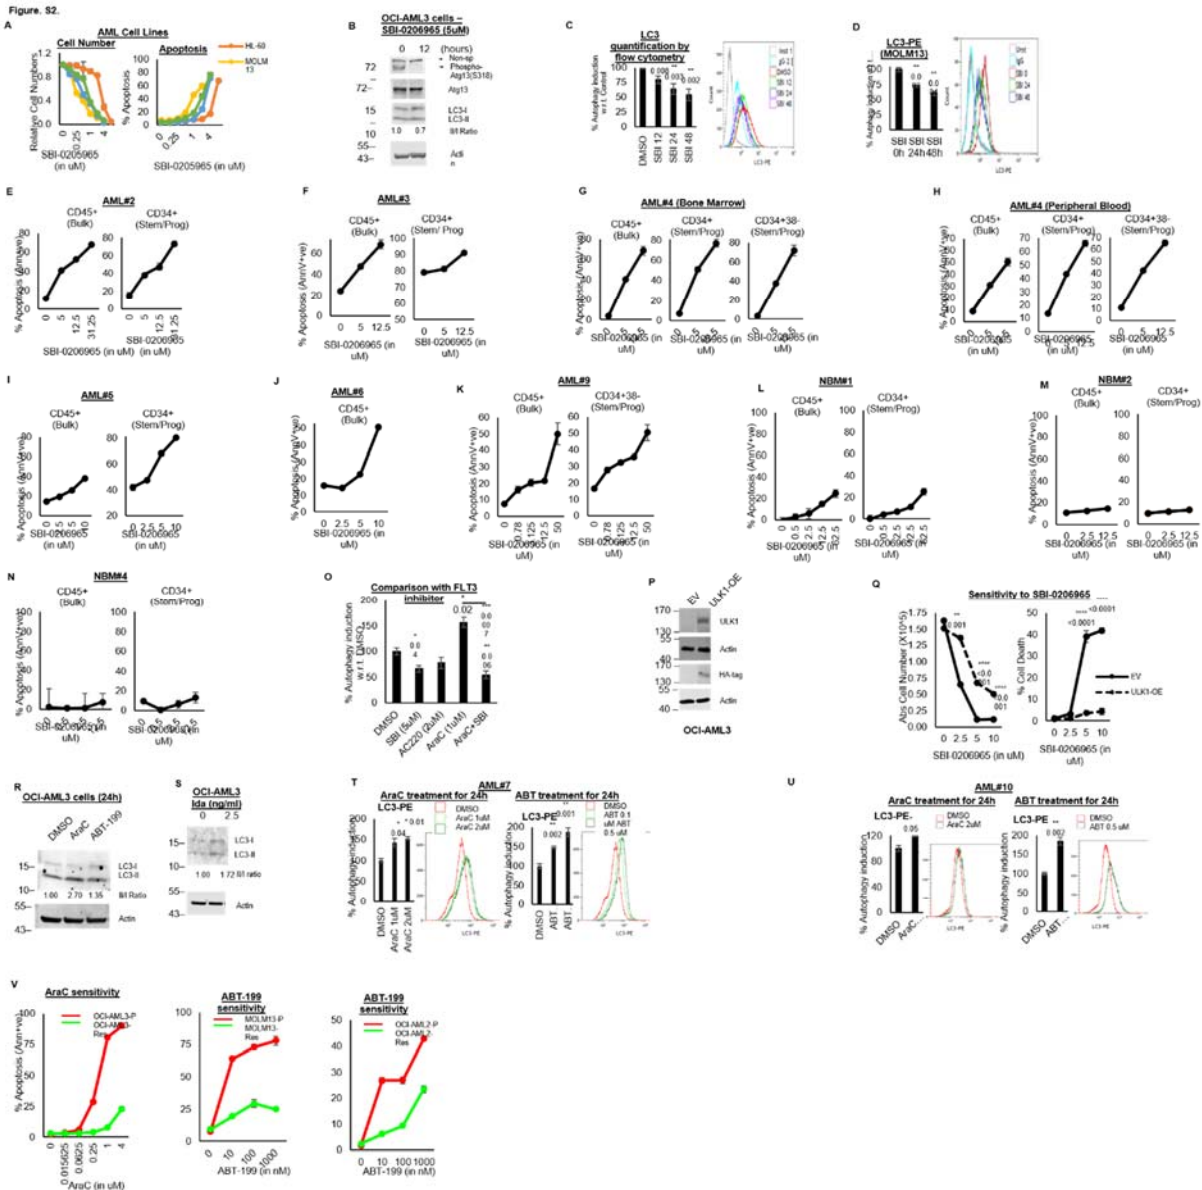

31  
32 **Supplementary Figure S2. ULK1 inhibitor SBI-0206965 has anti-leukemic activity and can**  
33 **overcome autophagic adaptation in drug-resistant cells.** (A) Representative line graphs  
34 showing relative cell numbers (from triplicates  $\pm$  SD; left) and percent apoptosis (from triplicates  
35  $\pm$  SD; right) from Annexin V/DAPI assay in 4 different AML cell lines (HL-60, MOLM13,  
36 MOLM14, and MV4;11) treated with increasing doses as indicated of SBI-0206965 for 72 hours.  
37 (B) Western blot analysis for Phospho-Atg13 (S318), Atg13 and LC3, in whole cell lysates of  
38 OCI-AML3 cells treated with 5uM of SBI-0206965 for indicated time points. (C-D)  
39 Representative bar graphs showing percent autophagy induction (calculated from triplicates  $\pm$  SD,  
40 in LC3-PE flow cytometry) with respect to DMSO treated control cells as 100 (left) and  
41 representative histograms (right) in OCI-AML3 cells treated with 5uM SBI-0206965 (C), and  
42 MOLM13 cells treated with 1uM SBI-0206965 (D) for indicated time points. (E-N) Representative  
43 line graphs showing percent apoptosis (from triplicates  $\pm$  SD) from Annexin V/DAPI assay in  
44 primary AML blasts (sample # 2, 3, 4, 5, 6 & 9) and normal bone marrow cells (NBM # 1, 2 & 4)  
45 treated with increasing doses as indicated of SBI-0206965 for 72 hours. Cell pellets were  
46 additionally stained with CD45, CD34 and CD38 surface markers to identify different  
47 subpopulations [bulk (CD45+ and stem/progenitor (CD34+ or CD34+CD38-)] by flow cytometry.  
48 (O) Representative bar graphs showing percent autophagy induction (calculated from triplicates  $\pm$   
49 SD, in LC3-PE flow cytometry) with respect to DMSO treated control cells as 100 in OCI-AML3  
50 cells treated with indicated drugs for 24 hours. (P) Western blot analysis for ULK1 overexpression  
51 in OCI-AML3 cells using ULK1 and HA-tag antibodies. EV stands for empty vector and ULK1-  
52 OE stands for ULK1 overexpression. (Q). Representative line graphs showing absolute cell  
53 numbers (left) and percent apoptosis (right) from triplicates  $\pm$  SD based on Annexin V/DAPI assay  
54 in EV and ULK1- OE cells treated with increasing doses as indicated of SBI-0206965 for 72 hours.  
55 (R) Western blot analysis of LC3 in whole cell lysates of OCI-AML3 cells treated with indicated  
56 drugs for 24 hours. (S) Western blot analysis of LC3 in whole cell lysates of OCI-AML3 cells  
57 treated with Idamycin for 24 hours. (T-U) Representative bar graphs showing percent autophagy  
58 induction (calculated from triplicates  $\pm$  SD, in LC3-PE flow cytometry) with respect to DMSO  
59 treated control cells as 100 (left) and representative histograms (right). Primary AML blasts were  
60 treated with increasing doses as indicated of AraC (left panel) or ABT-199 (right panel) for 24  
61 hours: sample # 7 (T) and sample # 10 (U). (V) Representative line graphs showing percent  
62 apoptosis (from triplicates  $\pm$  SD) in Annexin V/DAPI assay performed on parental and drug-  
63 resistant cells treated with respective drugs against which the resistance was developed to verify  
64 the robustness of the system before further experiments were performed on these cells. Drug  
65 treatment was performed for 72 hours: AraC on AraC resistant OCI-AML3 cells (left); and ABT-  
66 199 on ABT-199 resistant OCI-AML2 cells (middle) and ABT-199 resistant MOLM13 cells  
67 (right). Actin was used as the loading control and for densitometric measurements in all western  
68 blots. The statistical significance of the experiments was calculated by standard Student's t-test  
69 and p-values are indicated in respective graphs.

70

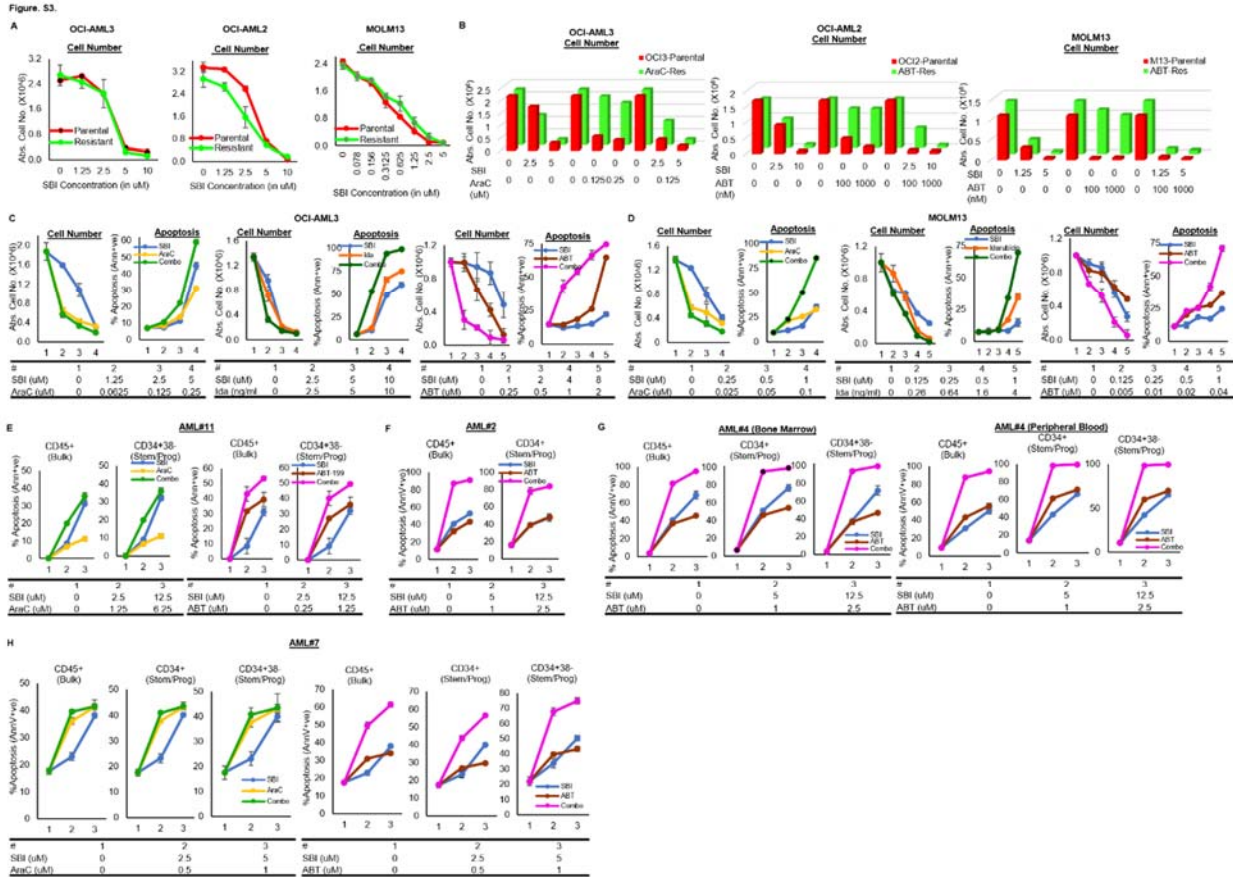

71  
 72 **Supplementary Figure S3. ULK1 inhibition reverses drug-resistance and synergizes with**  
 73 **AML therapies.** (A) Representative line graphs showing absolute cell numbers (from triplicates  
 74  $\pm$  SD) in parental and drug-resistant cells treated with increasing doses as indicated of SBI-  
 75 0206965 for 72 hours in Annexin V/DAPI assay. (B) Representative bar graphs comparing  
 76 absolute cell numbers in parental versus drug-resistant cells. Data is based on Annexin V/DAPI  
 77 assay after 72 hours of treatment with either SBI-0206965 alone or AML drugs alone or in  
 78 combination (as indicated in the respective plots), in cell lines OCI-AML3 (left), OCI-AML2  
 79 (middle) and MOLM13 (right). (C-D) Representative line graphs showing absolute cell numbers  
 80 (from triplicates  $\pm$  SD; left) and percent apoptosis (from triplicates  $\pm$  SD; right) from Annexin  
 81 V/DAPI assay: OCI-AML3 (C), and MOLM13 (D) treated with either SBI-0206965 or AML drugs  
 82 alone, and in combination (as indicated in the respective plots) for 72 hours. (E-H) Representative  
 83 line graphs showing percent apoptosis (from triplicates  $\pm$  SD) in an Annexin V/DAPI assay in  
 84 primary AML blasts subjected to drug combinations (as indicated in the respective plots) for 72  
 85 hours: sample # 11 (E), sample # 2 (F), sample # 4 (G), and sample # 7 (H). Cell pellets were  
 86 additionally stained with CD45, CD34 and CD38 surface markers to identify different  
 87 subpopulations [bulk (CD45+) and stem/progenitor (CD34+ or CD34+CD38-)] by flow  
 88 cytometry. The statistical significance of the experiments was calculated by standard Student's t-  
 89 test and p-values are indicated in respective graphs.



Figure. S4

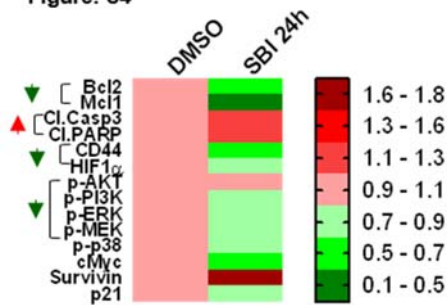

90  
 91 **Supplementary Figure S4. ULK1 inhibition changes signaling in AML cells.** Heat map  
 92 representing CyTOF experiment (generated using GraphPad) to show the changes in protein  
 93 expression of signaling molecules, based on different functional clusters in OCI-AML3 cells  
 94 treated with 5 $\mu$ M of SBI-0206965 for 24 hours.  
 95

Figure. S5.

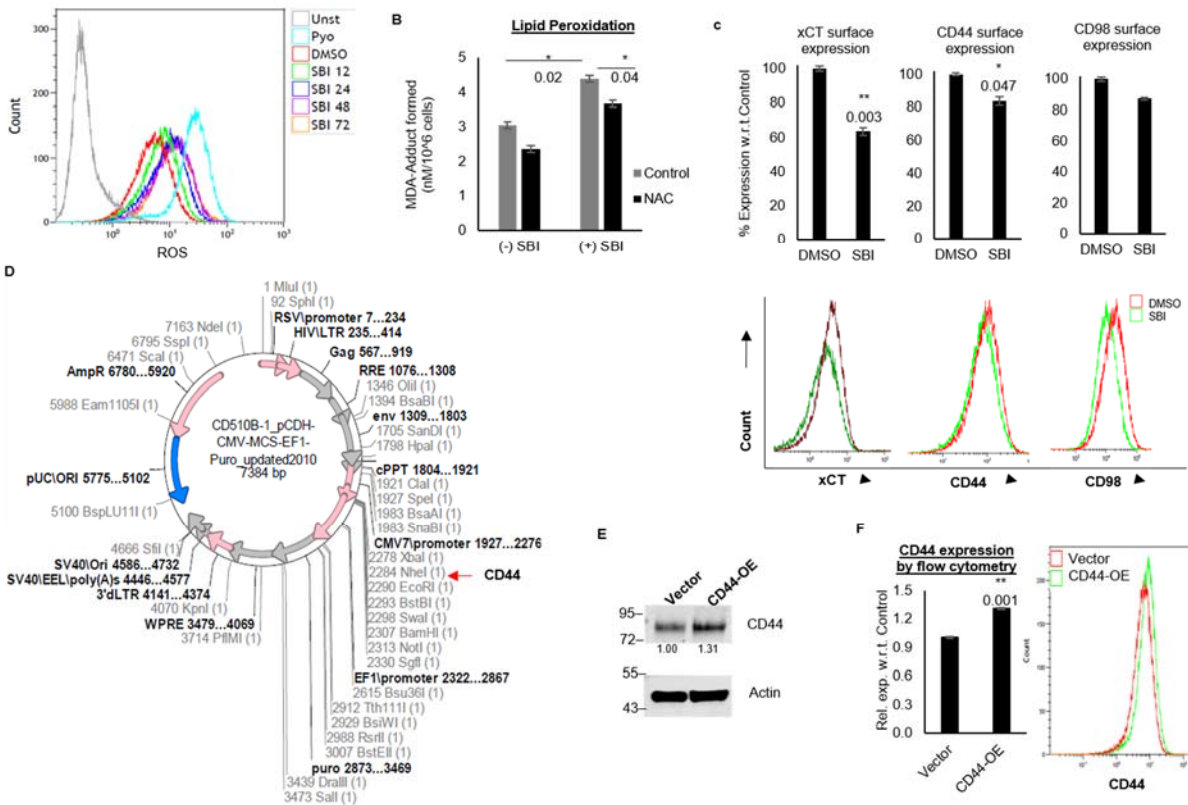

96  
 97  
 98 **Supplementary Figure S5. ULK1 inhibition hampers ROS.** (A) Representative histograms of  
 99 the ROS estimation shown in Figure 6A (in OCI-AML3). (B) Representative bar graphs showing  
 100 the amount MDA-adduct formed in nM per 10<sup>6</sup> cells (from triplicates  $\pm$  SD) to quantify lipid  
 101 peroxidation (colorimetrically) in OCI-AML3 cells treated with or without SBI-0206965 in the  
 102 presence or absence of NAC for 24 hours. (C) Representative bar graphs (mean intensity from  
 103 triplicates  $\pm$  SD) (upper panel) and representative histograms (lower panel) from the flow  
 104 cytometric experiment to determine surface expression of indicated molecules in OCI-AML3 cells  
 105 treated with DMSO or SBI-0206965 for 24 hours. (D) Pictorial representation of the lentiviral

106 vector used for CD44 overexpression. (E) Western blot analysis showing transient overexpression  
 107 of CD44 in whole cell lysates of OCI-AML3 cells. Actin was used as the loading control. (F)  
 108 Representative bar graph (mean intensity from triplicates  $\pm$  SD) (left) and representative  
 109 histograms (right) from the flow cytometric experiment to determine surface expression of CD44  
 110 in vector and CD44 overexpressing cells. The statistical significance of the experiments was  
 111 calculated by standard Student's t-test and p-values are indicated in respective graphs.'  
 112  
 113

Figure. S6.

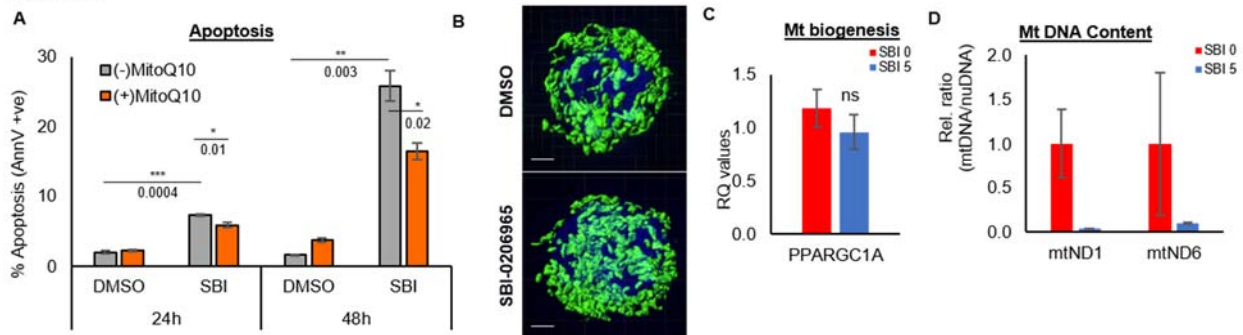

114  
 115 **Supplementary Figure S6. ULK1 inhibition accumulates dysfunctional mitochondria.** (A)  
 116 Representative bar graphs (mean percentage from triplicates  $\pm$  SD) from Annexin V/DAPI assay  
 117 to estimate the percentage of apoptosis in OCI-AML3 cells treated with or without SBI-0206965,  
 118 in the presence or absence of mitochondria specific antioxidant MitoQ10, for 24 or 48 hours. (B)  
 119 Representative 3D-reconstructed images to quantify mitochondrial volume in DMSO and SBI-  
 120 0206965 treated cells using Imaris software "Surfaces" (scale bar 2  $\mu$ m). (C) Representative bar  
 121 graphs (mean RQ value from triplicates  $\pm$  SD) from qRT-PCR assay performed for *PPARGC1A*  
 122 on RNA isolated from OCI-AML3 cells treated with 5 $\mu$ M of SBI-0206965 for 24 hours. RQ values  
 123 were generated from Ct values ( $2^{-\Delta\Delta Ct}$ ). (D) Representative bar graphs (mean of relative ratio from  
 124 triplicates  $\pm$  SD) from qRT-PCR assay performed simultaneously for mtND1 or mtND6 with  
 125 nuclear 18S rRNA on genomic DNA isolated from OCI-AML3 cells treated with 5 $\mu$ M of SBI-  
 126 0206965 for 24 hours. Relative ratio of expression was generated based on Ct values  
 127 ( $\Delta Ct_{Target}/\Delta Ct_{18S}$ ). The statistical significance of the experiments was calculated by standard  
 128 Student's t-test and p-values are indicated in respective graphs.

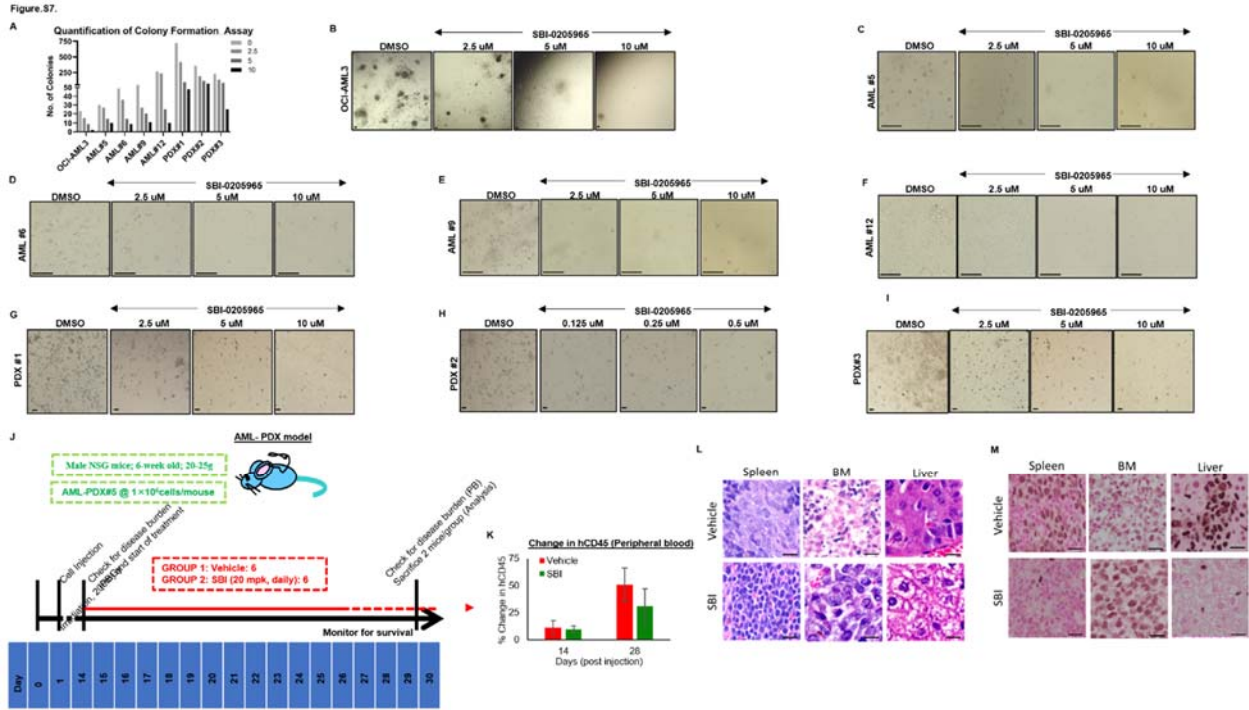

129  
130

131 **Supplementary Figure S7. ULK1 inhibition impairs colony forming ability and delays**  
 132 **leukemia progression.** (A) Representative bar graph showing the number of colonies formed in  
 133 different primary AML blasts in the presence of increasing doses of SBI-0206965. (B)  
 134 Representative images of colony formation assay performed in OCI-AML3 cells treated with  
 135 increasing doses of SBI-0206965 as indicated for 24 hours (4X magnification, 1 mm scale bar).  
 136 (C-F) Representative images of colony formation assay performed in primary AML blasts treated  
 137 with increasing doses of SBI-0206965 as indicated for 24 hours (20X magnification, 200  $\mu$ m  
 138 scale bar): AML sample # 5, 6, 9 and 12. (G-I) Representative images of colony formation assay  
 139 performed in primary AML blasts treated with increasing doses of SBI-0206965 as indicated for  
 140 24 hours (20X magnification, 500  $\mu$ m scale bar): PDX sample # 1, 2 and 3. (J) Schema showing  
 141 experimental details of the AML-PDX model: 6 weeks old male NOD scid-IL2R $\gamma$ <sup>null</sup> (NSG) mice  
 142 were irradiated (200mGy) 1 day prior to injection. Previously characterized AML-PDX cells were  
 143 injected on day 0 and engraftment was checked after 2 weeks by analysis of circulating human  
 144 CD45 in peripheral blood. Mice were randomly grouped and treated daily with vehicle and SBI-  
 145 0206965 (6 mice in each group). Disease burden was estimated in peripheral blood by quantifying  
 146 human CD45 positive cells by flow cytometry, in tissue specimens by H&E and human Ku80  
 147 immunohistochemical staining, and the survival was monitored over time. (K) Representative bar  
 148 graph showing the percentage change in circulating human CD45+ve cells by flow cytometry from  
 149 peripheral blood, to measure the disease burden over the course of the experiment. (L-M)  
 150 Representative images at 400X magnification (10  $\mu$ m scale bar) to analyze infiltration of leukemic  
 151 cells in different organs as indicated in the vehicle control and SBI-0206965 treated mice by H&E  
 152 staining (L) and immunohistochemistry of human Ku80 (M).

Figure S8.

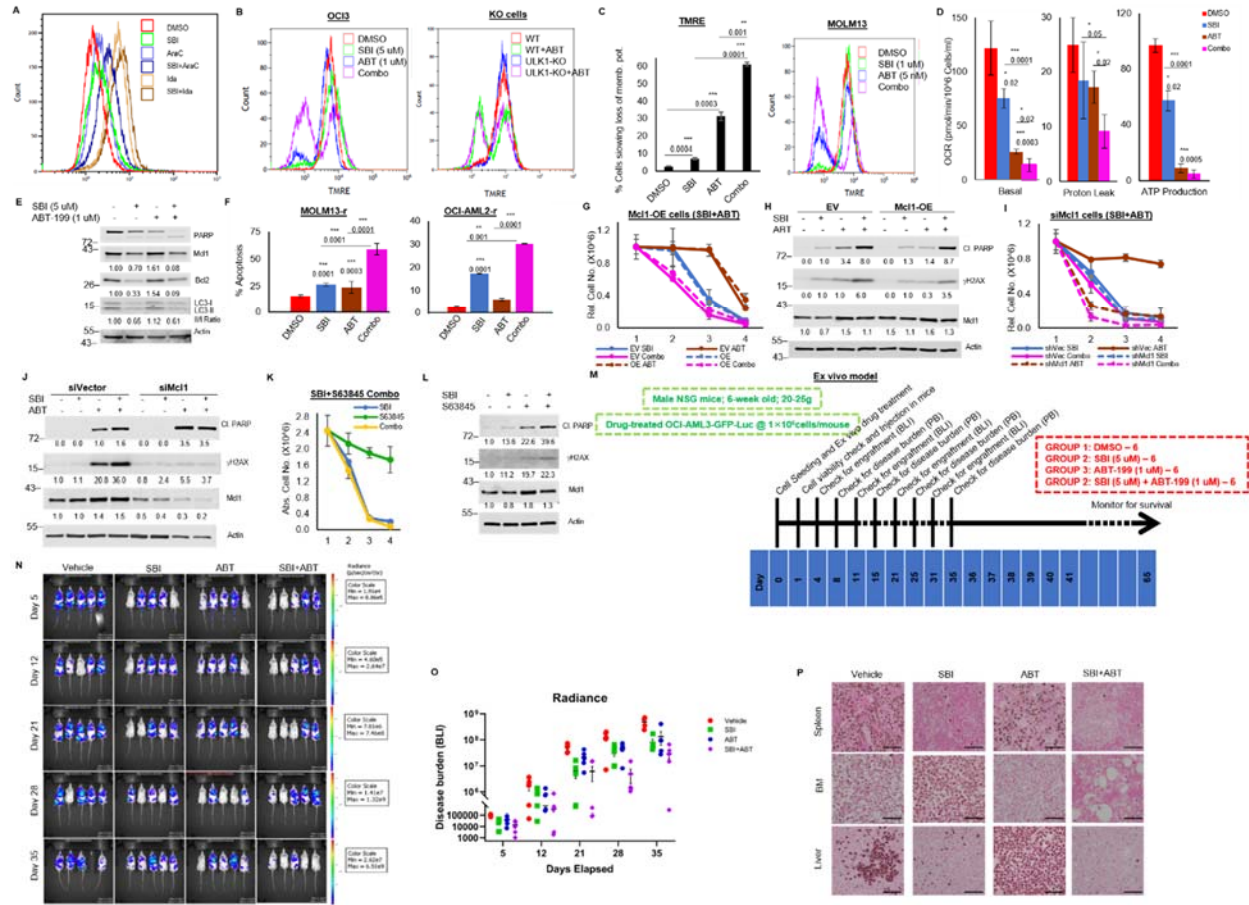

153  
 154 **Supplementary Figure S8. In vitro and in vivo synergy of ULK1 inhibition with AML**  
 155 **therapies.** (A) Representative histograms of the ROS estimation shown in Figure 8A. (B)  
 156 Representative histograms of TMRE assay performed in OCI-AML3 cells treated with single  
 157 agents SBI-0206965 or ABT-199, and in combination for 24 hours (left), and in WT and *ULK1*-  
 158 KO cells in the presence or absence of ABT-199 (right). (C) Representative bar graphs (mean  
 159 percentage from triplicates  $\pm$  SD) (left), with representative histograms (right) of TMRE assay to  
 160 quantify loss of membrane potential in MOLM13 cells treated with single agents SBI-0206965 or  
 161 ABT-199, and in combination for 24 hours. (D) Representative bar graphs (from triplicates  $\pm$  SD)  
 162 from the Seahorse Mito Stress test shown in Figure 8E with quantification of basal respiration  
 163 (left), proton leak (middle) or ATP production (right). (E) Western blot analysis for PARP, Mcl1,  
 164 Bcl2 and LC3 in whole cell lysates of OCI-AML3 cells treated with single agents SBI-0206965 or  
 165 ABT-199, and in combination for 24 hours. (F) Representative bar graphs (mean percentage from  
 166 triplicates  $\pm$  SD) from Annexin V/DAPI assay to estimate the percentage of apoptosis in ABT-199  
 167 resistant cells treated with single agents SBI-0206965 or ABT-199, and in combination for 72  
 168 hours. (G) Representative line graphs showing relative cell numbers (from triplicates  $\pm$  SD) from  
 169 flow cytometry experiment in vector control and Mcl1-OE cells treated with single agents SBI-  
 170 0206965 or ABT-199, and in combination for 72 hours. (H) Western blot analysis for apoptosis  
 171 markers and Mcl1 in whole cell lysates from vector control and Mcl1-OE cells treated with single  
 172 agents SBI-0206965 or ABT-199, and in combination for 24 hours. (I) Representative line graphs



173 showing relative cell numbers (from triplicates  $\pm$  SD) from flow cytometry experiment in vector  
174 control and shMcl1 cells treated with single agents SBI-0206965 or ABT-199, and in combination  
175 for 72 hours. (J) Western blot analysis for apoptosis markers and Mcl1 in whole cell lysates from  
176 vector control and shMcl1 cells treated with single agents SBI-0206965 or ABT-199, and in  
177 combination for 24 hours. (K) Representative line graphs showing relative cell numbers (from  
178 triplicates  $\pm$  SD) from flow cytometry experiment in OCI-AML3 cells treated with single agents  
179 SBI-0206965 or Mcl1 inhibitor (S63845), and in combination for 72 hours. (L) Western blot  
180 analysis for apoptosis markers and Mcl1 in whole cell lysates from OCI-AML3 cells treated with  
181 single agents SBI-0206965 or Mcl1 inhibitor (S63845), and in combination for 24 hours. (M)  
182 Schema showing experimental details of the ex vivo model: Luciferized OCI-AML3 cells were  
183 treated with vehicle and either SBI-0206965 or ABT-199 alone, and in combination, for 24 hours.  
184 Cell viability was measured thereafter, and equal number of viable cells were injected into 6 weeks  
185 old male NSG mice. Engraftment was checked after 3 days by BLI. Disease burden was estimated  
186 in whole body by BLI, in peripheral blood by quantifying human CD45 positive cells by flow  
187 cytometry, in tissue specimens by human Ku80 staining, and the survival was monitored over time.  
188 (N) BLI of ex vivo experiment showing vehicle, SBI-0206965, ABT-199 and combination groups  
189 monitored over time for disease progression. (O) Representative dot plot showing quantification  
190 of radiance from each individual mouse using the Living Image software (Caliper Life Sciences)  
191 based on BLI over time in the ex vivo model. (P) Representative images of immunohistochemistry  
192 of human Ku80 (100X magnification, 40  $\mu$ m scale bar) to analyze infiltration of leukemia in  
193 different organs as indicated, in the ex vivo model. Actin was used as the loading control in all  
194 western blots. The statistical significance of the experiments was calculated by standard Student's  
195 t-test and p-values are indicated in respective graphs.
